# Supplementary material for: The Protective Role of Exosome-Derived MicroRNAs and Proteins from Human Breast Milk against Infectious Agents
Source: MDPI journal article supplement (doi:10.3390/metabo13050635), 2023-05-08
Supplement: s1 [file s1]

Table S1. Total GO annotation of HBM-derived exosomal miRNA

| Term name                                          | Number of related genes | Number of miRNA | P-value |
|----------------------------------------------------|-------------------------|-----------------|---------|
| <i>Gene Ontology: Cell Component</i>               |                         |                 |         |
| cytosol                                            | 943                     | 17              | < 0.05  |
| nucleoplasm                                        | 425                     | 19              | < 0.05  |
| protein complex                                    | 1261                    | 19              | < 0.05  |
| cellular component                                 | 5978                    | 30              | < 0.05  |
| organelle                                          | 4753                    | 53              | < 0.05  |
| <i>Gene Ontology: Molecular Function</i>           |                         |                 |         |
| enzyme binding                                     | 516                     | 20              | < 0.05  |
| nucleic acid binding transcription factor activity | 470                     | 26              | < 0.05  |
| protein binding transcription factor activity      | 228                     | 28              | < 0.05  |
| molecular function                                 | 6721                    | 43              | < 0.05  |
| ion binding                                        | 2929                    | 52              | < 0.05  |
| HECT domain binding                                | 3                       | 17              | 3.3E-16 |
| cytoskeletal protein binding                       | 272                     | 12              | 2.2E-15 |
| enzyme regulator activity                          | 224                     | 7               | 3.3E-06 |
| miRNA binding                                      | 7                       | 9               | 2.9E-02 |
| <i>Gene Ontology: Biological Process</i>           |                         |                 |         |
| biosynthetic process                               | 1839                    | 46              | 1.3E-28 |
| gene expression                                    | 290                     | 35              | 1.7E-11 |
| immune response                                    |                         | 34              | 2.8E-02 |
| cell death                                         | 242                     | 9               | 3.6E-06 |
| mitotic cell cycle                                 | 72                      | 6               | 1.1E-02 |
| signal transduction                                | 608                     | 3               | 1.6E-04 |
| cell adhesion                                      | 38                      | 1               | 1.4E-03 |
| cell differentiation                               | 6                       | 1               | 2.6E-02 |
| cell proliferation                                 | 3                       | 1               | 4.4E-02 |

Table S2. Immune-related GO annotation of HBM-derived exosomal miRNA

| GO Category :Biological Process (immune related)              | Number of related gene | Number of miRNA | P-value  |
|---------------------------------------------------------------|------------------------|-----------------|----------|
| Fc-epsilon receptor signaling pathway                         | 102                    | 34              | 1.79E-15 |
| Fc-gamma receptor signaling pathway involved in phagocytosis  | 25                     | 3               | 1.58E-09 |
| toll-like receptor 10 signaling pathway                       | 20                     | 5               | 1.04E-04 |
| toll-like receptor TLR1:TLR2 signaling pathway                | 20                     | 5               | 1.71E-04 |
| toll-like receptor TLR6:TLR2 signaling pathway                | 20                     | 5               | 1.71E-04 |
| toll-like receptor 5 signaling pathway                        | 20                     | 4               | 3.01E-04 |
| TRIF-dependent toll-like receptor signaling pathway           | 22                     | 6               | 3.85E-04 |
| toll-like receptor 4 signaling pathway                        | 28                     | 5               | 4.85E-04 |
| toll-like receptor signaling pathway                          | 25                     | 4               | 5.72E-04 |
| toll-like receptor 9 signaling pathway                        | 20                     | 4               | 5.72E-04 |
| MyD88-independent toll-like receptor signaling pathway        | 19                     | 4               | 7.19E-04 |
| toll-like receptor 2 signaling pathway                        | 20                     | 4               | 1.17E-03 |
| toll-like receptor 3 signaling pathway                        | 17                     | 3               | 1.40E-03 |
| stress-activated MAPK cascade                                 | 15                     | 3               | 1.48E-03 |
| activation of phospholipase C activity                        | 13                     | 2               | 2.04E-03 |
| immune system process                                         | 132                    | 2               | 4.85E-03 |
| innate immune response                                        | 84                     | 3               | 6.36E-03 |
| JAK-STAT cascade involved in growth hormone signaling pathway | 6                      | 1               | 7.10E-03 |
| intrinsic apoptotic signaling pathway                         | 10                     | 1               | 7.25E-03 |
| MyD88-dependent toll-like receptor signaling pathway          | 20                     | 3               | 7.33E-03 |
| neuron cell-cell adhesion                                     | 8                      | 3               | 9.00E-03 |
| cellular response to glucagon stimulus                        | 6                      | 2               | 9.97E-03 |
| apoptotic signaling pathway                                   | 22                     | 2               | 1.09E-02 |
| intracellular receptor signaling pathway                      | 6                      | 2               | 1.60E-02 |
| positive regulation of cell proliferation in bone marrow      | 1                      | 1               | 2.04E-02 |
| negative regulation of interleukin-13 production              | 1                      | 1               | 2.04E-02 |
| T-helper 1 cell differentiation                               | 1                      | 1               | 2.40E-02 |
| negative regulation of interleukin-5 production               | 1                      | 1               | 2.40E-02 |
| negative regulation of interleukin-4 production               | 1                      | 1               | 2.40E-02 |
| neutrophil differentiation                                    | 1                      | 1               | 2.40E-02 |
| negative regulation of transcription, DNA-templated           | 11                     | 1               | 2.50E-02 |
| positive regulation of granulocyte differentiation            | 1                      | 1               | 2.67E-02 |
| transforming growth factor beta receptor signaling pathway    | 17                     | 2               | 3.22E-02 |
| alpha-beta T cell differentiation                             | 1                      | 1               | 3.22E-02 |
| inositol phosphate metabolic process                          | 11                     | 2               | 3.30E-02 |
| positive regulation by host of viral transcription            | 1                      | 1               | 3.41E-02 |
| activation of protein kinase A activity                       | 5                      | 2               | 3.62E-02 |
| positive regulation of signal transduction                    | 10                     | 1               | 4.10E-02 |
| positive regulation of activated T cell proliferation         | 1                      | 1               | 4.18E-02 |
| cellular response to interleukin-4                            | 1                      | 1               | 4.18E-02 |
| cellular response to cytokine stimulus                        | 1                      | 1               | 4.22E-02 |
| regulation of Wnt signaling pathway                           | 1                      | 1               | 4.26E-02 |
| negative regulation of peptidyl-threonine phosphorylation     | 1                      | 1               | 4.41E-02 |
| positive regulation of cytokine production                    | 1                      | 1               | 4.63E-02 |
| positive regulation of epithelial to mesenchymal transition   | 1                      | 1               | 4.86E-02 |

Table S3. Total KEGG pathway analysis of HBM-derived exosomal miRNA

| Term name                                                               | Number of<br>Related gene | Number of<br>miRNA | P-value  |
|-------------------------------------------------------------------------|---------------------------|--------------------|----------|
| Proteoglycans in cancer                                                 | 118                       | 36                 | 1.76E-06 |
| Glioma                                                                  | 38                        | 32                 | 1.56E-05 |
| FoxO signaling pathway                                                  | 75                        | 27                 | 2.20E-04 |
| ECM-receptor interaction                                                | 42                        | 25                 | 6.57E-27 |
| Signaling pathways regulating pluripotency of stem cells                | 67                        | 24                 | 6.92E-06 |
| Pathways in cancer                                                      | 154                       | 23                 | 7.98E-05 |
| Focal adhesion                                                          | 102                       | 23                 | 4.48E-04 |
| TGF-beta signaling pathway                                              | 42                        | 21                 | 3.45E-06 |
| Regulation of actin cytoskeleton                                        | 113                       | 21                 | 2.65E-04 |
| Transcriptional misregulation in cancer                                 | 74                        | 20                 | 1.50E-03 |
| Mucin type O-Glycan biosynthesis                                        | 14                        | 19                 | 8.93E-11 |
| Wnt signaling pathway                                                   | 50                        | 19                 | 9.33E-07 |
| MAPK signaling pathway                                                  | 111                       | 19                 | 5.85E-05 |
| PI3K-Akt signaling pathway                                              | 149                       | 19                 | 3.45E-04 |
| mTOR signaling pathway                                                  | 30                        | 19                 | 1.86E-03 |
| Estrogen signaling pathway                                              | 49                        | 18                 | 4.78E-06 |
| Morphine addiction                                                      | 44                        | 17                 | 1.31E-06 |
| Renal cell carcinoma                                                    | 36                        | 17                 | 1.53E-05 |
| Glycosaminoglycan biosynthesis - keratan sulfate                        | 10                        | 17                 | 2.22E-05 |
| Dilated cardiomyopathy                                                  | 34                        | 17                 | 4.45E-03 |
| Dorso-ventral axis formation                                            | 14                        | 17                 | 5.44E-03 |
| p53 signaling pathway                                                   | 35                        | 16                 | 1.59E-05 |
| Basal cell carcinoma                                                    | 17                        | 16                 | 2.59E-04 |
| Oocyte meiosis                                                          | 36                        | 16                 | 7.68E-04 |
| Non-small cell lung cancer                                              | 25                        | 16                 | 2.09E-03 |
| Rap1 signaling pathway                                                  | 105                       | 16                 | 7.11E-03 |
| Cytokine-cytokine receptor interaction                                  | 51                        | 15                 | 8.73E-08 |
| ErbB signaling pathway                                                  | 49                        | 15                 | 5.50E-07 |
| Amphetamine addiction                                                   | 32                        | 15                 | 2.53E-06 |
| Neurotrophin signaling pathway                                          | 63                        | 15                 | 8.33E-06 |
| Melanoma                                                                | 29                        | 15                 | 3.31E-05 |
| Long-term depression                                                    | 23                        | 15                 | 2.81E-04 |
| Long-term potentiation                                                  | 37                        | 15                 | 4.08E-04 |
| Ras signaling pathway                                                   | 101                       | 15                 | 9.41E-04 |
| Hypertrophic cardiomyopathy (HCM)                                       | 37                        | 15                 | 1.93E-03 |
| AMPK signaling pathway                                                  | 51                        | 15                 | 4.36E-03 |
| Hippo signaling pathway                                                 | 64                        | 14                 | 4.95E-09 |
| Lysine degradation                                                      | 24                        | 14                 | 9.71E-07 |
| Thyroid cancer                                                          | 12                        | 14                 | 7.51E-05 |
| Prostate cancer                                                         | 45                        | 14                 | 4.32E-04 |
| Ubiquitin mediated proteolysis                                          | 57                        | 13                 | 2.33E-05 |
| Valine, leucine and isoleucine biosynthesis                             | 1                         | 13                 | 6.16E-04 |
| cGMP-PKG signaling pathway                                              | 66                        | 13                 | 1.96E-03 |
| cAMP signaling pathway                                                  | 82                        | 13                 | 8.15E-03 |
| GABAergic synapse                                                       | 32                        | 12                 | 2.46E-06 |
| Amoebiasis                                                              | 14                        | 12                 | 4.31E-06 |
| Thyroid hormone signaling pathway                                       | 49                        | 12                 | 4.19E-05 |
| Glycosaminoglycan biosynthesis - heparan sulfate / heparin              | 9                         | 11                 | 1.57E-08 |
| Phosphatidylinositol signaling system                                   | 33                        | 11                 | 3.85E-06 |
| Circadian entrainment                                                   | 37                        | 11                 | 1.19E-05 |
| Cocaine addiction                                                       | 20                        | 11                 | 1.47E-04 |
| Chronic myeloid leukemia                                                | 30                        | 11                 | 7.36E-04 |
| Hepatitis B                                                             | 39                        | 11                 | 1.14E-02 |
| Endometrial cancer                                                      | 19                        | 11                 | 1.27E-02 |
| MicroRNAs in cancer                                                     | 47                        | 10                 | 1.26E-07 |
| Glycosaminoglycan biosynthesis - chondroitin sulfate / dermatan sulfate | 7                         | 10                 | 2.17E-07 |
| Gap junction                                                            | 34                        | 10                 | 5.78E-07 |
| Cell cycle                                                              | 29                        | 10                 | 9.69E-05 |
| Adherens junction                                                       | 38                        | 10                 | 2.19E-04 |
| Bacterial invasion of epithelial cells                                  | 30                        | 10                 | 2.45E-04 |
| Viral carcinogenesis                                                    | 62                        | 10                 | 3.49E-04 |
| Nicotine addiction                                                      | 24                        | 10                 | 4.40E-04 |
| Adrenergic signaling in cardiomyocytes                                  | 52                        | 10                 | 1.12E-03 |
| Glycosphingolipid biosynthesis - ganglio series                         | 5                         | 10                 | 2.76E-03 |
| RNA transport                                                           | 32                        | 9                  | 3.42E-04 |
| Small cell lung cancer                                                  | 24                        | 9                  | 6.94E-04 |
| Prolactin signaling pathway                                             | 23                        | 9                  | 9.83E-04 |
| Dopaminergic synapse                                                    | 57                        | 9                  | 4.96E-03 |
| Type II diabetes mellitus                                               | 9                         | 9                  | 5.05E-03 |
| HIF-1 signaling pathway                                                 | 33                        | 9                  | 6.23E-03 |
| Pancreatic cancer                                                       | 25                        | 9                  | 1.11E-02 |
| Glycosphingolipid biosynthesis - lacto and neolacto series              | 11                        | 8                  | 2.17E-14 |
| Glutamatergic synapse                                                   | 43                        | 8                  | 1.55E-04 |
| Arrhythmogenic right ventricular cardiomyopathy (ARVC)                  | 30                        | 8                  | 2.14E-04 |
| Melanogenesis                                                           | 36                        | 8                  | 4.00E-04 |
| Protein digestion and absorption                                        | 12                        | 8                  | 7.88E-04 |
| Nucleotide excision repair                                              | 9                         | 8                  | 1.38E-03 |
| Sphingolipid signaling pathway                                          | 29                        | 8                  | 2.40E-03 |
| Pyrimidine metabolism                                                   | 11                        | 8                  | 1.18E-02 |
| Ovarian steroidogenesis                                                 | 4                         | 8                  | 1.38E-02 |
| Inflammatory mediator regulation of TRP channels                        | 32                        | 8                  | 2.56E-02 |
| Cell adhesion molecules (CAMs)                                          | 39                        | 7                  | 1.16E-03 |
| Viral myocarditis                                                       | 10                        | 7                  | 1.29E-02 |
| Choline metabolism in cancer                                            | 40                        | 7                  | 1.38E-02 |
| Insulin signaling pathway                                               | 40                        | 7                  | 2.53E-02 |
| Other types of O-glycan biosynthesis                                    | 12                        | 6                  | 4.55E-09 |
| Axon guidance                                                           | 56                        | 6                  | 9.34E-06 |
| Retrograde endocannabinoid signaling                                    | 34                        | 6                  | 3.32E-03 |
| Oxytocin signaling pathway                                              | 49                        | 6                  | 3.37E-03 |
| Hedgehog signaling pathway                                              | 12                        | 6                  | 5.89E-03 |
| Progesterone-mediated oocyte maturation                                 | 22                        | 6                  | 6.18E-03 |
| Alcoholism                                                              | 28                        | 6                  | 9.88E-03 |
| Prion diseases                                                          | 1                         | 5                  | 1.48E-45 |
| Allograft rejection                                                     | 7                         | 5                  | 1.32E-06 |
| Folate biosynthesis                                                     | 3                         | 5                  | 1.57E-06 |
| One carbon pool by folate                                               | 4                         | 5                  | 2.33E-05 |
| Synaptic vesicle cycle                                                  | 14                        | 5                  | 8.04E-05 |
| Inositol phosphate metabolism                                           | 19                        | 5                  | 1.54E-04 |
| Endocytosis                                                             | 46                        | 5                  | 2.66E-04 |
| 2-Oxocarboxylic acid metabolism                                         | 4                         | 5                  | 8.51E-04 |
| Central carbon metabolism in cancer                                     | 12                        | 5                  | 1.03E-03 |
| Sphingolipid metabolism                                                 | 10                        | 5                  | 1.05E-03 |
| SNARE interactions in vesicular transport                               | 12                        | 5                  | 1.36E-03 |
| NF-kappa B signaling pathway                                            | 9                         | 5                  | 1.56E-03 |
| Circadian rhythm                                                        | 11                        | 5                  | 1.62E-03 |

|                                                           |    |   |          |
|-----------------------------------------------------------|----|---|----------|
| Glycerophospholipid metabolism                            | 18 | 5 | 2.68E-03 |
| Glycosphingolipid biosynthesis - globo series             | 4  | 5 | 1.08E-02 |
| Valine, leucine and isoleucine degradation                | 10 | 5 | 1.12E-02 |
| Phenylalanine, tyrosine and tryptophan biosynthesis       | 3  | 5 | 1.24E-02 |
| Colorectal cancer                                         | 11 | 5 | 1.38E-02 |
| Aldosterone-regulated sodium reabsorption                 | 15 | 5 | 2.08E-02 |
| Insulin secretion                                         | 20 | 5 | 2.13E-02 |
| HTLV-I infection                                          | 41 | 5 | 4.13E-02 |
| Thyroid hormone synthesis                                 | 19 | 4 | 7.87E-12 |
| Fatty acid degradation                                    | 5  | 4 | 6.02E-08 |
| Nicotinate and nicotinamide metabolism                    | 6  | 4 | 5.32E-05 |
| N-Glycan biosynthesis                                     | 15 | 4 | 2.53E-04 |
| Maturity onset diabetes of the young                      | 6  | 4 | 2.67E-04 |
| Protein processing in endoplasmic reticulum               | 31 | 4 | 3.61E-04 |
| Fatty acid metabolism                                     | 11 | 4 | 4.75E-04 |
| Cholinergic synapse                                       | 23 | 4 | 1.35E-03 |
| Sulfur metabolism                                         | 3  | 4 | 2.38E-03 |
| Calcium signaling pathway                                 | 37 | 4 | 2.96E-03 |
| Degradation of aromatic compounds                         | 1  | 4 | 4.12E-03 |
| Salivary secretion                                        | 18 | 4 | 4.97E-03 |
| Pancreatic secretion                                      | 22 | 4 | 5.59E-03 |
| Primary bile acid biosynthesis                            | 3  | 4 | 1.21E-02 |
| Herpes simplex infection                                  | 7  | 4 | 1.38E-02 |
| T cell receptor signaling pathway                         | 29 | 4 | 1.49E-02 |
| Tight junction                                            | 21 | 4 | 1.92E-02 |
| Leukocyte transendothelial migration                      | 16 | 4 | 2.21E-02 |
| Alanine, aspartate and glutamate metabolism               | 9  | 4 | 2.26E-02 |
| Mismatch repair                                           | 1  | 4 | 3.09E-02 |
| Steroid hormone biosynthesis                              | 8  | 3 | 1.21E-15 |
| Porphyrin and chlorophyll metabolism                      | 11 | 3 | 6.73E-05 |
| Other glycan degradation                                  | 1  | 3 | 1.37E-04 |
| Biosynthesis of unsaturated fatty acids                   | 3  | 3 | 3.54E-04 |
| Serotonergic synapse                                      | 18 | 3 | 5.44E-04 |
| Thiamine metabolism                                       | 1  | 3 | 7.39E-04 |
| Fanconi anemia pathway                                    | 8  | 3 | 8.22E-04 |
| Platelet activation                                       | 24 | 3 | 9.14E-04 |
| Retinol metabolism                                        | 14 | 3 | 2.33E-03 |
| Apoptosis                                                 | 9  | 3 | 3.82E-03 |
| Acute myeloid leukemia                                    | 10 | 3 | 4.86E-03 |
| Endocrine and other factor-regulated calcium reabsorption | 9  | 3 | 5.18E-03 |
| Adipocytokine signaling pathway                           | 17 | 3 | 6.39E-03 |
| Cardiac muscle contraction                                | 13 | 3 | 7.38E-03 |
| GnRH signaling pathway                                    | 21 | 3 | 8.54E-03 |
| D-Glutamine and D-glutamate metabolism                    | 1  | 3 | 8.75E-03 |
| Propanoate metabolism                                     | 3  | 3 | 1.01E-02 |
| Bladder cancer                                            | 11 | 3 | 1.50E-02 |
| Vascular smooth muscle contraction                        | 14 | 3 | 1.80E-02 |
| Vitamin digestion and absorption                          | 3  | 3 | 1.99E-02 |
| RNA degradation                                           | 16 | 3 | 2.31E-02 |
| Toll-like receptor signaling pathway                      | 4  | 3 | 2.50E-02 |
| Chagas disease (American trypanosomiasis)                 | 13 | 3 | 2.70E-02 |
| Biotin metabolism                                         | 1  | 2 | 2.34E-11 |
| Vasopressin-regulated water reabsorption                  | 14 | 2 | 1.14E-07 |
| Taste transduction                                        | 2  | 2 | 2.16E-05 |
| Antigen processing and presentation                       | 9  | 2 | 2.35E-05 |
| Shigellosis                                               | 9  | 2 | 4.61E-05 |
| Drug metabolism - cytochrome P450                         | 8  | 2 | 8.19E-05 |
| Hematopoietic cell lineage                                | 7  | 2 | 1.85E-04 |
| Pantothenate and CoA biosynthesis                         | 3  | 2 | 3.26E-04 |
| Steroid biosynthesis                                      | 3  | 2 | 3.95E-04 |
| Ascorbate and aldarate metabolism                         | 7  | 2 | 4.11E-04 |
| Amyotrophic lateral sclerosis (ALS)                       | 11 | 2 | 7.41E-04 |
| Gastric acid secretion                                    | 12 | 2 | 8.58E-04 |
| Arachidonic acid metabolism                               | 6  | 2 | 8.99E-04 |
| Autoimmune thyroid disease                                | 4  | 2 | 9.67E-04 |
| Metabolism of xenobiotics by cytochrome P450              | 3  | 2 | 1.38E-03 |
| Cysteine and methionine metabolism                        | 3  | 2 | 1.75E-03 |
| Proteasome                                                | 3  | 2 | 2.07E-03 |
| Pentose and glucuronate interconversions                  | 7  | 2 | 3.51E-03 |
| Glyoxylate and dicarboxylate metabolism                   | 3  | 2 | 5.26E-03 |
| Ribosome biogenesis in eukaryotes                         | 5  | 2 | 5.62E-03 |
| Salmonella infection                                      | 6  | 2 | 5.84E-03 |
| Fc gamma R-mediated phagocytosis                          | 11 | 2 | 7.03E-03 |
| Drug metabolism - other enzymes                           | 8  | 2 | 1.02E-02 |
| Fc epsilon RI signaling pathway                           | 13 | 2 | 1.27E-02 |
| Notch signaling pathway                                   | 4  | 2 | 1.40E-02 |
| Purine metabolism                                         | 4  | 2 | 1.51E-02 |
| Pathogenic Escherichia coli infection                     | 5  | 2 | 1.75E-02 |
| Citrate cycle (TCA cycle)                                 | 4  | 2 | 2.53E-02 |
| Starch and sucrose metabolism                             | 8  | 2 | 3.19E-02 |
| Graft-versus-host disease                                 | 5  | 2 | 3.89E-02 |
| Asthma                                                    | 4  | 2 | 4.11E-02 |
| Tryptophan metabolism                                     | 2  | 2 | 4.53E-02 |
| Taurine and hypotaurine metabolism                        | 2  | 2 | 4.65E-02 |
| Fatty acid elongation                                     | 2  | 1 | 1.72E-04 |
| Terpenoid backbone biosynthesis                           | 2  | 1 | 3.38E-04 |
| Inflammatory bowel disease (IBD)                          | 5  | 1 | 4.66E-04 |
| B cell receptor signaling pathway                         | 12 | 1 | 1.06E-03 |
| Jak-STAT signaling pathway                                | 9  | 1 | 1.24E-03 |
| Renin-angiotensin system                                  | 2  | 1 | 1.36E-03 |
| Bile secretion                                            | 6  | 1 | 2.45E-03 |
| Ether lipid metabolism                                    | 2  | 1 | 2.70E-03 |
| Non-alcoholic fatty liver disease (NAFLD)                 | 10 | 1 | 6.85E-03 |
| Glycosylphosphatidylinositol (GPI)-anchor biosynthesis    | 2  | 1 | 7.18E-03 |
| Biosynthesis of amino acids                               | 3  | 1 | 1.00E-02 |
| Ribosome                                                  | 1  | 1 | 1.18E-02 |
| Peroxisome                                                | 7  | 1 | 1.23E-02 |
| Neuroactive ligand-receptor interaction                   | 13 | 1 | 1.36E-02 |
| Osteoclast differentiation                                | 16 | 1 | 1.61E-02 |
| Leishmaniasis                                             | 4  | 1 | 1.99E-02 |
| Fructose and mannose metabolism                           | 2  | 1 | 2.12E-02 |
| Phototransduction                                         | 2  | 1 | 2.19E-02 |
| Phagosome                                                 | 5  | 1 | 2.39E-02 |
| VEGF signaling pathway                                    | 4  | 1 | 2.62E-02 |
| Amino sugar and nucleotide sugar metabolism               | 1  | 1 | 2.75E-02 |
| Systemic lupus erythematosus                              | 1  | 1 | 2.77E-02 |
| Riboflavin metabolism                                     | 2  | 1 | 2.97E-02 |
| Base excision repair                                      | 1  | 1 | 2.98E-02 |
| Cyanoamino acid metabolism                                | 1  | 1 | 3.05E-02 |
| Protein export                                            | 1  | 1 | 3.24E-02 |
| Arginine and proline metabolism                           | 2  | 1 | 3.35E-02 |

|                                                     |   |   |          |
|-----------------------------------------------------|---|---|----------|
| Epstein-Barr virus infection                        | 9 | 1 | 3.48E-02 |
| beta-Alanine metabolism                             | 1 | 1 | 3.89E-02 |
| Homologous recombination                            | 2 | 1 | 3.90E-02 |
| Pertussis                                           | 5 | 1 | 3.97E-02 |
| Intestinal immune network for IgA production        | 3 | 1 | 4.21E-02 |
| Ubiquinone and other terpenoid-quinone biosynthesis | 1 | 1 | 4.23E-02 |
| Glycolysis / Gluconeogenesis                        | 2 | 1 | 4.49E-02 |
| Spliceosome                                         | 3 | 1 | 4.63E-02 |
| Alzheimer's disease                                 | 7 | 1 | 4.69E-02 |
| Mineral absorption                                  | 4 | 1 | 4.90E-02 |

---

Table S4. Immune-related KEGG pathway analysis of HBM-derived exosomal miRNA

| Term name                                              | Number of<br>Related gene | Number of<br>miRNA | P-value  |
|--------------------------------------------------------|---------------------------|--------------------|----------|
| <b><i>Cancer and Tumor Related Pathways</i></b>        |                           |                    |          |
| Proteoglycans in cancer                                | 109                       | 25                 | < 0.05   |
| Transcriptional misregulation in cancer                | 66                        | 15                 | 4.88E-12 |
| Pathways in cancer                                     | 142                       | 15                 | 2.12E-14 |
| MicroRNAs in cancer                                    | 45                        | 8                  | 1.77E-07 |
| Central carbon metabolism in cancer                    | 12                        | 5                  | 1.03E-03 |
| Renal cell carcinoma                                   | 36                        | 17                 | 1.53E-05 |
| Endometrial cancer                                     | 19                        | 11                 | 1.27E-02 |
| Prostate cancer                                        | 45                        | 14                 | 4.32E-04 |
| Chronic myeloid leukemia                               | 30                        | 11                 | 7.36E-04 |
| Basal cell carcinoma                                   | 17                        | 16                 | 2.59E-04 |
| Melanoma                                               | 29                        | 15                 | 3.31E-05 |
| Acute myeloid leukemia                                 | 10                        | 3                  | 4.86E-03 |
| Non-small cell lung cancer                             | 25                        | 16                 | 2.09E-03 |
| Thyroid cancer                                         | 12                        | 14                 | 7.51E-05 |
| Small cell lung cancer                                 | 24                        | 9                  | 6.94E-04 |
| Colorectal cancer                                      | 11                        | 5                  | 1.38E-02 |
| Bladder cancer                                         | 11                        | 3                  | 1.50E-02 |
| <b><i>Signaling Pathways</i></b>                       |                           |                    |          |
| Cell cycle                                             | 29                        | 10                 | 9.69E-05 |
| Ras signaling pathway                                  | 101                       | 15                 | 9.41E-04 |
| PI3K-Akt signaling pathway                             | 149                       | 19                 | 3.45E-04 |
| HIF-1 signaling pathway                                | 33                        | 9                  | 6.23E-03 |
| mTOR signaling pathway                                 | 30                        | 19                 | 1.86E-03 |
| Hippo signaling pathway                                | 64                        | 14                 | 4.95E-09 |
| p53 signaling pathway                                  | 35                        | 16                 | 1.59E-05 |
| Notch signaling pathway                                | 4                         | 2                  | 1.40E-02 |
| VEGF signaling pathway                                 | 4                         | 1                  | 2.62E-02 |
| <b><i>Pathogenic Microbial Infection</i></b>           |                           |                    |          |
| Viral myocarditis                                      | 10                        | 7                  | 1.29E-02 |
| HTLV-I infection                                       | 41                        | 5                  | 4.13E-02 |
| Hepatitis B                                            | 39                        | 11                 | 1.14E-02 |
| Viral carcinogenesis                                   | 62                        | 10                 | 3.49E-04 |
| Epstein-Barr virus infection                           | 9                         | 1                  | 3.48E-02 |
| Herpes simplex infection                               | 7                         | 4                  | 1.38E-02 |
| Bacterial invasion of epithelial cells                 | 30                        | 10                 | 2.45E-04 |
| Pathogenic Escherichia coli infection                  | 5                         | 2                  | 1.75E-02 |
| Salmonella infection                                   | 6                         | 2                  | 5.84E-03 |
| Shigellosis                                            | 9                         | 2                  | 4.61E-05 |
| Chagas disease (American trypanosomiasis)              | 13                        | 3                  | 2.70E-02 |
| Pertussis                                              | 5                         | 1                  | 3.97E-02 |
| Amoebiasis                                             | 14                        | 12                 | 4.31E-06 |
| Leishmaniasis                                          | 4                         | 1                  | 1.99E-02 |
| <b><i>Immune System and Inflammatory Disease</i></b>   |                           |                    |          |
| Allograft rejection                                    | 7                         | 5                  | 1.32E-06 |
| Graft-versus-host disease                              | 5                         | 2                  | 3.89E-02 |
| Toll-like receptor signaling pathway                   | 4                         | 3                  | 2.50E-02 |
| NF-kappa B signaling pathway                           | 9                         | 5                  | 1.56E-03 |
| Cytokine-cytokine receptor interaction                 | 51                        | 15                 | 8.73E-08 |
| Antigen processing and presentation                    | 9                         | 2                  | 2.35E-05 |
| Systemic lupus erythematosus                           | 1                         | 1                  | 2.77E-02 |
| Intestinal immune network for IgA production           | 3                         | 1                  | 4.21E-02 |
| Renin-angiotensin system                               | 2                         | 1                  | 1.36E-03 |
| Non-alcoholic fatty liver disease (NAFLD)              | 10                        | 1                  | 6.85E-03 |
| Inflammatory bowel disease (IBD)                       | 5                         | 1                  | 4.66E-04 |
| <b><i>Others</i></b>                                   |                           |                    |          |
| Hypertrophic cardiomyopathy (HCM)                      | 5                         | 1                  | 4.66E-04 |
| Prion diseases                                         | 1                         | 5                  | 1.48E-45 |
| Dilated cardiomyopathy                                 | 34                        | 17                 | 4.45E-03 |
| Arrhythmogenic right ventricular cardiomyopathy (ARVC) | 30                        | 8                  | 2.14E-04 |
| Fatty acid degradation                                 | 5                         | 4                  | 6.02E-08 |

Table S5. Total GO annotation of HBM-derived exosomal proteins

| # Term ID                                | Term name                              | P-value  |
|------------------------------------------|----------------------------------------|----------|
| <i>Gene Ontology: Cell Component</i>     |                                        |          |
| GO:0005576                               | extracellular region                   | 1.4E-155 |
| GO:0031982                               | vesicle                                | 8.2E-130 |
| GO:0005829                               | cytosol                                | 2.1E-36  |
| GO:0031012                               | extracellular matrix                   | 2.0E-13  |
| GO:0005783                               | endoplasmic reticulum                  | 1.2E-11  |
| GO:0005886                               | plasma membrane                        | 2.0E-10  |
| GO:0005856                               | cytoskeleton                           | 1.6E-04  |
| GO:0005794                               | Golgi apparatus                        | 2.6E-03  |
| <i>Gene Ontology: Molecular Function</i> |                                        |          |
| GO:0005198                               | structural molecule activity           | 8.0E-19  |
| GO:0005102                               | signaling receptor binding             | 1.8E-15  |
| GO:0019899                               | enzyme binding                         | 2.9E-08  |
| GO:0016787                               | hydrolase activity                     | 1.2E-06  |
| GO:0003824                               | catalytic activity                     | 1.5E-05  |
| GO:0005488                               | binding                                | 2.1E-05  |
| GO:0034987                               | immunoglobulin receptor binding        | 6.4E-05  |
| GO:0045182                               | translation regulator activity         | 3.7E-04  |
| GO:0016209                               | antioxidant activity                   | 1.2E-03  |
| GO:0023026                               | MHC class II protein complex binding   | 1.9E-03  |
| GO:0019900                               | kinase binding                         | 2.6E-03  |
| GO:0003823                               | antigen binding                        | 5.8E-03  |
| GO:0030234                               | enzyme regulator activity              | 3.5E-02  |
| <i>Gene Ontology: Biological Process</i> |                                        |          |
| GO:0006412                               | translation                            | 2.5E-23  |
| GO:0006810                               | transport                              | 3.3E-11  |
| GO:0032502                               | developmental process                  | 8.4E-10  |
| GO:0048856                               | anatomical structure development       | 1.5E-09  |
| GO:0009058                               | biosynthetic process                   | 1.5E-07  |
| GO:0065007                               | biological regulation                  | 7.6E-06  |
| GO:0006955                               | immune response                        | 8.4E-06  |
| GO:0008219                               | cell death                             | 1.4E-05  |
| GO:0030154                               | cell differentiation                   | 1.8E-05  |
| GO:0010628                               | positive regulation of gene expression | 6.8E-05  |
| GO:0023052                               | signaling                              | 8.1E-04  |
| GO:0007165                               | signal transduction                    | 3.7E-03  |
| GO:0007338                               | single fertilization                   | 9.1E-03  |

Table S6. Immune-related GO annotation of HBM-derived exosomal protein

| GO Category :Biological Process (immune related)        | Number of proteins | -log10(p-value) |
|---------------------------------------------------------|--------------------|-----------------|
| GO:0006952 Defense response                             | 71                 | 8.13            |
| GO:0006909 Phagocytosis                                 | 27                 | 7.95            |
| GO:0002376 Immune system process                        | 96                 | 7.53            |
| GO:0006959 Humoral immune response                      | 26                 | 6.97            |
| GO:0006956 Complement activation                        | 17                 | 6.71            |
| GO:0002252 Immune effector process                      | 38                 | 6.49            |
| GO:0002253 Activation of immune response                | 27                 | 5.82            |
| GO:0045087 Innate immune response                       | 43                 | 5.38            |
| GO:0006955 Immune response                              | 68                 | 5.07            |
| GO:0006958 Complement activation, classical pathway     | 14                 | 5.03            |
| GO:0006911 Phagocytosis, engulfment                     | 15                 | 5.01            |
| GO:0098542 Defense response to other organism           | 49                 | 5.00            |
| GO:0002682 Regulation of immune system process          | 57                 | 4.83            |
| GO:0050776 Regulation of immune response                | 41                 | 4.63            |
| GO:0034097 Response to cytokine                         | 41                 | 4.53            |
| GO:0006954 Inflammatory response                        | 37                 | 4.23            |
| GO:0009617 Response to bacterium                        | 36                 | 4.11            |
| GO:0002684 Positive regulation of immune system process | 41                 | 3.91            |
| GO:0002443 Leukocyte mediated immunity                  | 26                 | 3.87            |
| GO:0016064 Immunoglobulin mediated immune response      | 17                 | 3.85            |
| GO:0019724 B cell mediated immunity                     | 17                 | 3.76            |
| GO:0006910 Phagocytosis, recognition                    | 12                 | 3.39            |
| GO:0002764 Immune response-regulating signaling pathway | 26                 | 3.06            |
| GO:0002449 Lymphocyte mediated immunity                 | 21                 | 2.82            |
| GO:0050851 Antigen receptor-mediated signaling pathway  | 17                 | 2.59            |
| GO:0071353 Cellular response to interleukin-4           | 7                  | 2.55            |
| GO:0001667 Ameboid-type cell migration                  | 23                 | 2.48            |
| GO:0042742 Defense response to bacterium                | 21                 | 2.41            |
| GO:0050853 B cell receptor signaling pathway            | 12                 | 2.32            |
| GO:0070670 Response to interleukin-4                    | 7                  | 2.28            |
| GO:0002696 Positive regulation of leukocyte activation  | 23                 | 2.26            |

Table S7. Total KEGG pathway analysis of HBM-derived exosomal protein

| #Term ID | Term name                                       |    | Number of protein | Protein list |           |           |          |        |          |          |          |       |          |          |      | P-value |          |
|----------|-------------------------------------------------|----|-------------------|--------------|-----------|-----------|----------|--------|----------|----------|----------|-------|----------|----------|------|---------|----------|
| hsa04145 | Phagosome                                       | 14 | C3                | TLR2         | THBS1     | RAB7A     | CD14     | TUBA1B | TUBB     | ACTB     | RAB5B    | CTSS  | HLA-C    | HLA-A    | CD36 | MRC1    | 8.71E-10 |
| hsa04610 | Complement and coagulation cascades             | 11 | VTN               | C3           | C9        | PLG       | CLU      | A2M    | FGG      | C4BPA    | CFH      | C4A   | SERPINA1 |          |      |         | 5.15E-09 |
| hsa05132 | Salmonella infection                            | 14 | MAPK1             | PFN1         | GAPDH     | TNFSF10   | TLR2     | RAB7A  | CD14     | HSP90AA1 | ACTB     | RAB5B | FLNA     | HSP90AB1 | RHOA | FLNB    | 3.56E-08 |
| hsa05205 | Proteoglycans in cancer                         | 13 | MAPK1             | VTN          | TLR2      | THBS1     | IQGAP1   | FN1    | ACTB     | EZR      | FLNA     | HSPG2 | RPS6     | RHOA     |      |         | 1.33E-07 |
| hsa04612 | Antigen processing and presentation             | 8  | PDIA3             | HSPA5        | HSP90AA1  | CTSS      | HSP90AB1 | HSPA1B | HLA-C    | HLA-A    |          |       |          |          |      |         | 1.65E-06 |
| hsa05152 | Tuberculosis                                    | 11 | MAPK1             | CTSD         | C3        | TLR2      | RAB7A    | CD14   | RAB5B    | CTSS     | HSPD1    | RHOA  | MRC1     |          |      |         | 1.92E-06 |
| hsa04979 | Cholesterol metabolism                          | 7  | APOB              | APOA1        | APOE      | LPL       | APOA4    | APOA2  | CD36     |          |          |       |          |          |      |         | 3.85E-06 |
| hsa05130 | Pathogenic Escherichia coli infection           | 10 | MAPK1             | MYH9         | GAPDH     | TNFSF10   | NCL      | TUBA1B | TUBB     | ACTB     | EZR      | RHOA  |          |          |      |         | 3.63E-05 |
| hsa04510 | Focal adhesion                                  | 10 | MAPK1             | VTN          | THBS1     | TNC       | EGF      | FN1    | ACTB     | FLNA     | RHOA     | FLNB  |          |          |      |         | 5.28E-05 |
| hsa04810 | Regulation of actin cytoskeleton                | 10 | MAPK1             | MYH9         | PFN1      | EGF       | IQGAP1   | FN1    | ACTB     | EZR      | GSN      | RHOA  |          |          |      |         | 7.56E-05 |
| hsa05150 | Staphylococcus aureus infection                 | 7  | C3                | ICAM1        | PLG       | FGG       | CFH      | KRT18  | C4A      |          |          |       |          |          |      |         | 9.27E-05 |
| hsa04512 | ECM-receptor interaction                        | 7  | VTN               | THBS1        | TNC       | FN1       | HSPG2    | NNPT   | CD36     |          |          |       |          |          |      |         | 9.80E-05 |
| hsa04144 | Endocytosis                                     | 10 | RAB11A            | RAB7A        | VPS35     | KIF5B     | RAB5B    | HSPA1B | HLA-C    | FOLR1    | HLA-A    | RHOA  |          |          |      |         | 2.00E-04 |
| hsa05146 | Amoebiasis                                      | 7  | HSPB1             | TLR2         | C9        | RAB7A     | CD14     | FN1    | RAB5B    |          |          |       |          |          |      |         | 2.00E-04 |
| hsa05133 | Pertussis                                       | 6  | MAPK1             | C3           | CD14      | C4BPA     | C4A      | RHOA   |          |          |          |       |          |          |      |         | 3.60E-04 |
| hsa05144 | Malaria                                         | 5  | TLR2              | THBS1        | CD81      | ICAM1     | CD36     |        |          |          |          |       |          |          |      |         | 4.80E-04 |
| hsa03010 | Ribosome                                        | 7  | RPL3              | RPL22        | RPS6      | RPL13A    | RPS14    | RPLP0  | RPS19    |          |          |       |          |          |      |         | 7.60E-04 |
| hsa05203 | Viral carcinogenesis                            | 8  | MAPK1             | C3           | HIST2H2BE | GSN       | HLA-C    | HLA-A  | RHOA     | LYN      |          |       |          |          |      |         | 8.00E-04 |
| hsa05134 | Legionellosis                                   | 5  | C3                | TLR2         | CD14      | HSPA1B    | HSPD1    |        |          |          |          |       |          |          |      |         | 9.00E-04 |
| hsa04520 | Adherens junction                               | 5  | MAPK1             | IQGAP1       | ACTB      | RHOA      | YES1     |        |          |          |          |       |          |          |      |         | 2.10E-03 |
| hsa04151 | PI3K-Akt signaling pathway                      | 10 | MAPK1             | VTN          | TLR2      | THBS1     | TNC      | EGF    | HSP90AA1 | FN1      | HSP90AB1 | RPS6  |          |          |      |         | 2.50E-03 |
| hsa03320 | PPAR signaling pathway                          | 5  | APOA1             | LPL          | APOA2     | CD36      | ACSL1    |        |          |          |          |       |          |          |      |         | 3.10E-03 |
| hsa04975 | Fat digestion and absorption                    | 4  | APOB              | APOA1        | APOA4     | CD36      |          |        |          |          |          |       |          |          |      |         | 3.40E-03 |
| hsa04210 | Apoptosis                                       | 6  | MAPK1             | CTSD         | TNFSF10   | TUBA1B    | ACTB     | CTSS   |          |          |          |       |          |          |      |         | 4.70E-03 |
| hsa04915 | Estrogen signaling pathway                      | 6  | MAPK1             | CTSD         | HSP90AA1  | HSP90AB1  | HSPA1B   | KRT18  |          |          |          |       |          |          |      |         | 4.70E-03 |
| hsa05169 | Epstein-Barr virus infection                    | 7  | TLR2              | ICAM1        | PDIA3     | HLA-C     | HLA-A    | LYN    | VIM      |          |          |       |          |          |      |         | 5.20E-03 |
| hsa05020 | Prion disease                                   | 8  | MAPK1             | ATP5B        | C9        | KIF5B     | HSPA5    | TUBA1B | TUBB     | HSPA1B   |          |       |          |          |      |         | 6.40E-03 |
| hsa05416 | Viral myocarditis                               | 4  | ICAM1             | ACTB         | HLA-C     | HLA-A     |          |        |          |          |          |       |          |          |      |         | 7.90E-03 |
| hsa04530 | Tight junction                                  | 6  | MYH9              | TUBA1B       | ACTB      | EZR       | RAB13    | RHOA   |          |          |          |       |          |          |      |         | 8.90E-03 |
| hsa04977 | Vitamin digestion and absorption                | 3  | APOB              | APOA1        | APOA4     |           |          |        |          |          |          |       |          |          |      |         | 8.90E-03 |
| hsa05010 | Alzheimer disease                               | 9  | MAPK1             | GAPDH        | APOE      | ADAM10    | ATP5B    | KIF5B  | LPL      | TUBA1B   | TUBB     |       |          |          |      |         | 8.90E-03 |
| hsa05206 | MicroRNAs in cancer                             | 6  | MAPK1             | THBS1        | TNC       | EZR       | RHOA     | VIM    |          |          |          |       |          |          |      |         | 9.40E-03 |
| hsa05164 | Influenza A                                     | 6  | MAPK1             | TNFSF10      | RAB11A    | ICAM1     | PLG      | ACTB   |          |          |          |       |          |          |      |         | 1.06E-02 |
| hsa04650 | Natural killer cell mediated cytotoxicity       | 5  | MAPK1             | TNFSF10      | ICAM1     | HLA-C     | HLA-A    |        |          |          |          |       |          |          |      |         | 1.58E-02 |
| hsa04611 | Platelet activation                             | 5  | MAPK1             | FGG          | ACTB      | RHOA      | LYN      |        |          |          |          |       |          |          |      |         | 1.59E-02 |
| hsa05165 | Human papillomavirus infection                  | 8  | MAPK1             | VTN          | THBS1     | TNC       | EGF      | FN1    | HLA-C    | HLA-A    |          |       |          |          |      |         | 1.72E-02 |
| hsa05167 | Kaposi sarcoma-associated herpesvirus infection | 6  | MAPK1             | C3           | ICAM1     | HLA-C     | HLA-A    | LYN    |          |          |          |       |          |          |      |         | 1.75E-02 |
| hsa05418 | Fluid shear stress and atherosclerosis          | 5  | ICAM1             | HSP90AA1     | ACTB      | HSP90AB1  | RHOA     |        |          |          |          |       |          |          |      |         | 1.92E-02 |
| hsa04015 | Rap1 signaling pathway                          | 6  | MAPK1             | PFN1         | THBS1     | EGF       | ACTB     | RHOA   |          |          |          |       |          |          |      |         | 2.40E-02 |
| hsa04940 | Type I diabetes mellitus                        | 3  | HLA-C             | HSPD1        | HLA-A     |           |          |        |          |          |          |       |          |          |      |         | 2.40E-02 |
| hsa05219 | Bladder cancer                                  | 3  | MAPK1             | THBS1        | EGF       |           |          |        |          |          |          |       |          |          |      |         | 2.61E-02 |
| hsa04540 | Gap junction                                    | 4  | MAPK1             | EGF          | TUBA1B    | TUBB      |          |        |          |          |          |       |          |          |      |         | 2.63E-02 |
| hsa04010 | MAPK signaling pathway                          | 7  | MAPK1             | HSPB1        | EGF       | CD14      | FLNA     | HSPA1B | FLNB     |          |          |       |          |          |      |         | 2.95E-02 |
| hsa05131 | Shigellosis                                     | 6  | MAPK1             | PFN1         | C3        | CD14      | ACTB     | RHOA   |          |          |          |       |          |          |      |         | 3.08E-02 |
| hsa05322 | Systemic lupus erythematosus                    | 4  | C3                |              | C9        | HIST2H2BE | C4A      |        |          |          |          |       |          |          |      |         | 3.08E-02 |
| hsa05215 | Prostate cancer                                 | 4  | MAPK1             | EGF          | HSP90AA1  | HSP90AB1  |          |        |          |          |          |       |          |          |      |         | 3.36E-02 |
| hsa05142 | Chagas disease                                  | 4  | MAPK1             | C3           | TLR2      |           | ACE      |        |          |          |          |       |          |          |      |         | 3.65E-02 |
| hsa04620 | Toll-like receptor signaling pathway            | 4  | MAPK1             | TLR2         | CD14      | TOLLIP    |          |        |          |          |          |       |          |          |      |         | 3.83E-02 |
| hsa04141 | Protein processing in endoplasmic reticulum     | 5  | PDIA3             | HSPA5        | HSP90AA1  | HSP90AB1  | HSPA1B   |        |          |          |          |       |          |          |      |         | 3.97E-02 |
| hsa04066 | HIF-1 signaling pathway                         | 4  | MAPK1             | GAPDH        | EGF       | RPS6      |          |        |          |          |          |       |          |          |      |         | 4.32E-02 |
| hsa00061 | Fatty acid biosynthesis                         | 2  | FASN              | ACSL1        |           |           |          |        |          |          |          |       |          |          |      |         | 4.66E-02 |
| hsa04670 | Leukocyte transendothelial migration            | 4  | ICAM1             | ACTB         | EZR       | RHOA      |          |        |          |          |          |       |          |          |      |         | 4.66E-02 |
